# Supplementary material for: IL6 Fuels Durable Memory for Th17 Cell–Mediated Responses to Tumors
Source: Oxford University Press journal article supplement (doi:10.1158/0008-5472.can-19-3685), 2020-06-19
Supplement: 00085472can193685-sup-232897_2_supp_6345192_qbmfjf.docx [file 00085472can193685-sup-232897_2_supp_6345192_qbmfjf.docx]

*Supplementary Figures for*

**IL-6 fuels durable memory for Th17 cell-mediated**

**responses to tumors**

Hannah MKnochelmann*, Connor J Dwyer, Aubrey S Smith, Jacob S Bowers,

Megan M Wyatt, Michelle H Nelson, Guillermo O Rangel Rivera,

Joshua D Horton, Carsten Krieg, Kent Armeson, Gregory B Lesinski,

Mark P Rubinstein, Zihai Li, Chrystal M Paulos*

***Corresponding authors:** Hannah Knochelmann ([knochelm@musc.edu](mailto:knochelm@musc.edu)) or

Chrystal Paulos (paulos@musc.edu)

**This file includes:**

Supplementary Materials:

Table 1, Complete list of antibodies

Supplemental Figures 1 to 6

**Supplementary Materials**

Table 1: Complete list of antibodies

| **Target** | **Clone** | **Fluorophore** | **Manufacturer** |
| --- | --- | --- | --- |
| αm-Vβ14 | 14-2 | FITC | BD Biosciences |
| αm-CD4 | GK1.5 | APC Cy7 | BD Biosciences |
| RM4-5 | PE | BD Biosciences |
| αm-CD44 | IM7 | PerCpCy5.5 | Biolegend |
| αm-CD62L | MEL-14 | APC | Biolegend |
| MEL-14 | BV605 | Biolegend |
| αm-CD25 | PC61 | PE | BD Biosciences |
| αm/h-ICOS | C398.4A | BV421 | Biolegend |
| αm-CD28 | 37.51 | PerCpCy5.5 | Biolegend |
| αm-OX40 | OX-86 | APC | Biolegend |
| αm-CD69 | H1.2F3 | PeCy7 | Biolegend |
| αm-CD95 | Jo2 | PeCy7 | BD Biosciences |
| αm-PD-1 | 29F.1A12 | PerCpCy5.5 | Biolegend |
| αm-CD8 | 53-6.7 | PE | Invitrogen |
| 53-6.7 | PeCy7 | BD Biosciences |
| 53-6.7 | AF700 | Biolegend |
| αm-CD19 | 1D3 | BV786 | BD Biosciences |
| αm-CLA | HECA-452 | AF647 | Biolegend |
| αm-CD103 | 2.00E+07 | PE | Invitrogen |
| αm-CD45.2 | 104 | APCcy7 | Biolegend |
| αm-FoxP3 | FJK-16s | v450 | Invitrogen |
| αm-IgG F(ab’)2 | Polyclonal | FITC | Jackson Immunoresearch Laboratories |
| αh-CD45 | HI30 | V450 | BD Biosciences |
| αh-CD4 | RPA-T4 | PE | eBioscience |

**Supplementary Figures**


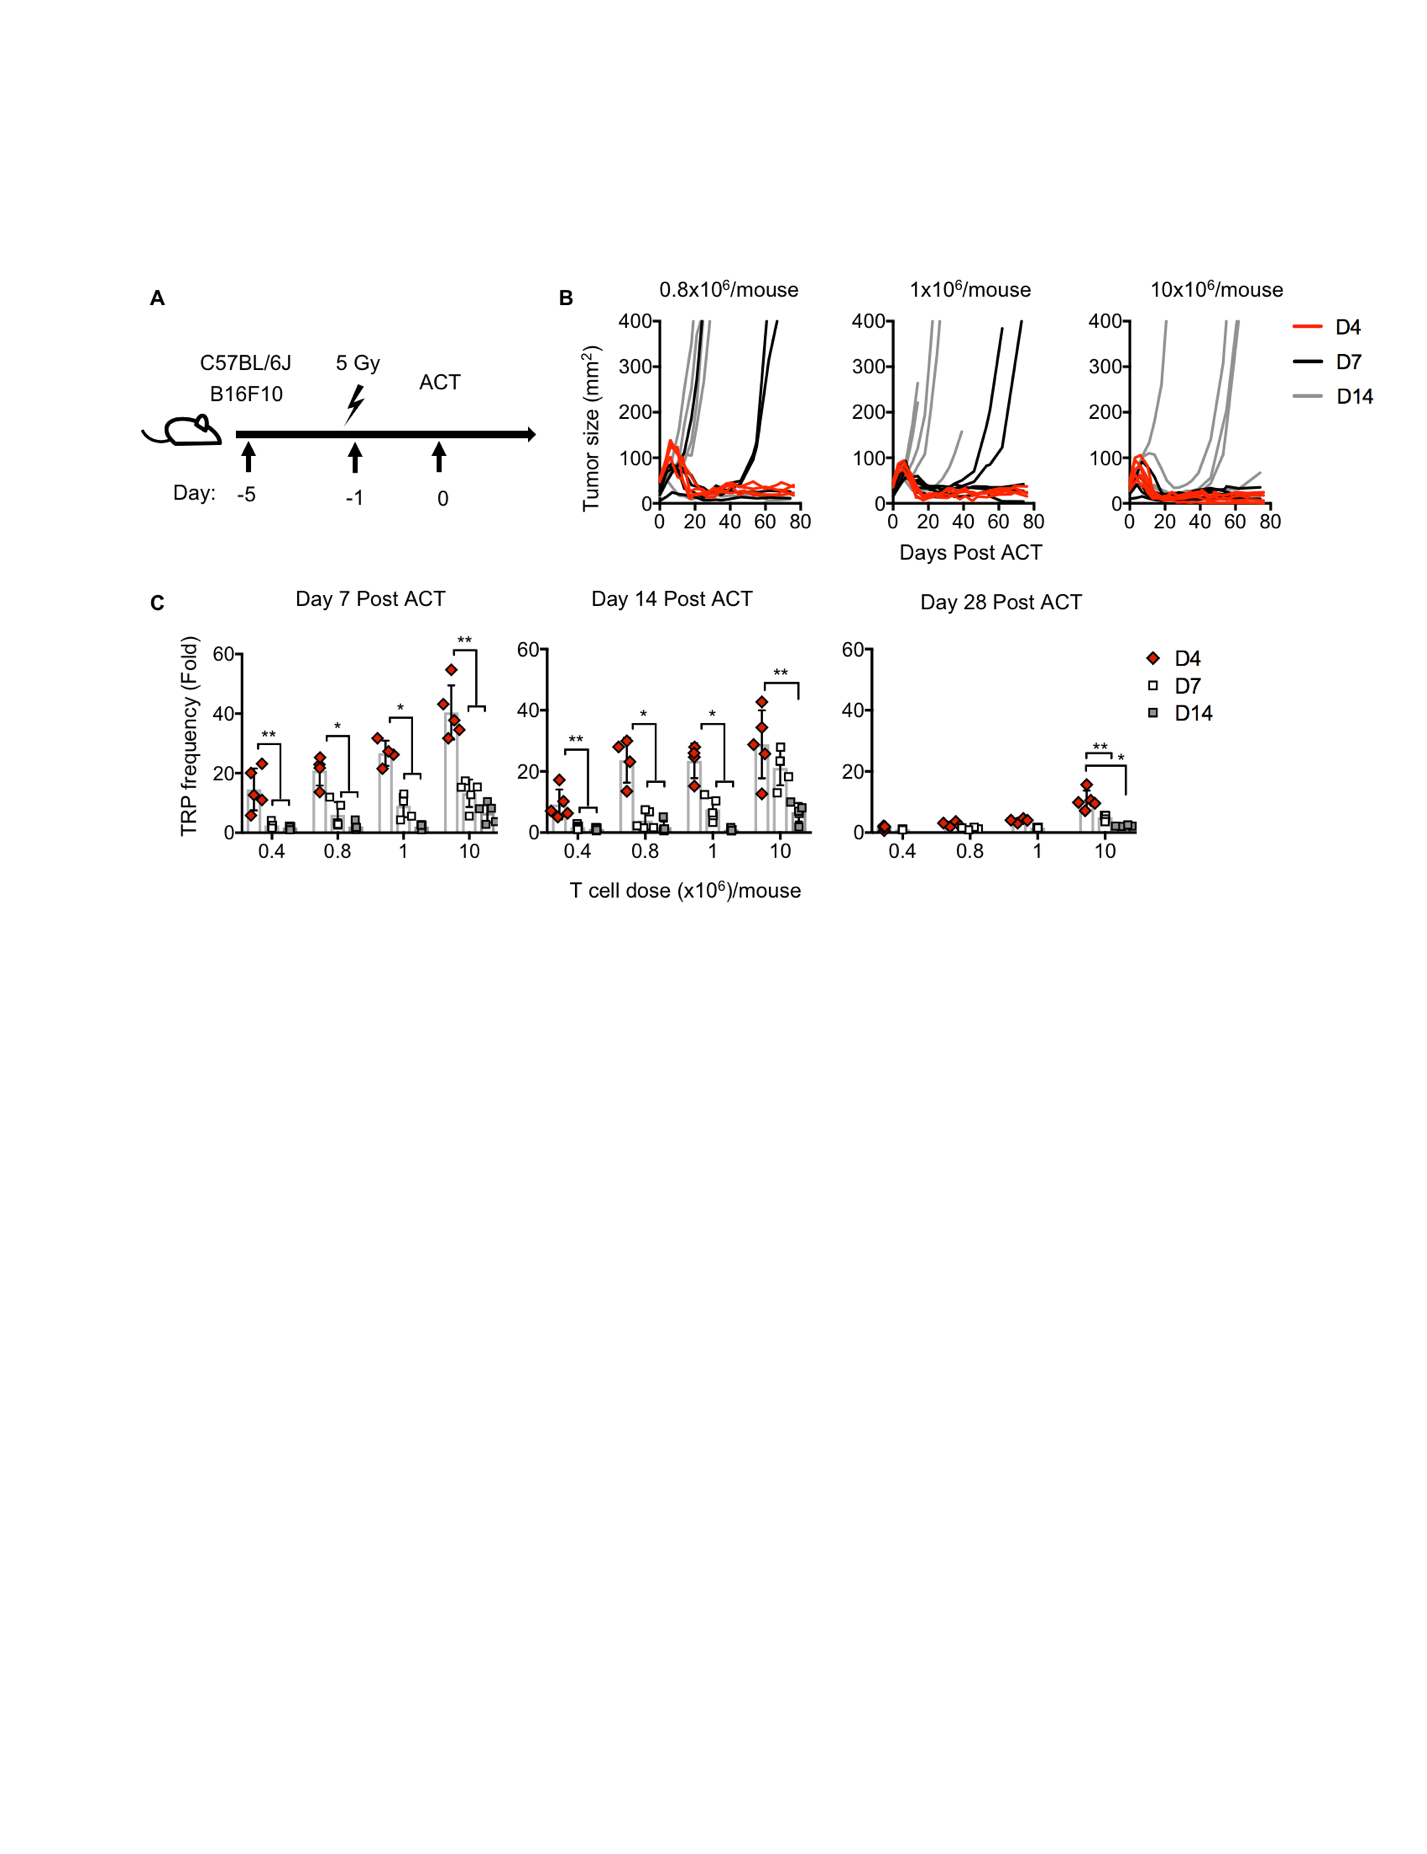


**Figure S1. Day 4 Th17 cells have heightened engraftment and persistence versus long-term expanded Th17 cells.** A) ACT schematic. TRP-1 CD4+ T cells were activated with TRP-1 peptide, polarized to Th17 phenotype, and infused into mice with B16F10 melanoma. T cell dose ranging from 0.8-10x106 cells/mouse was administered to animals as indicated. B) Individual tumor curves where each line represents one mouse. n=5/group from one experiment. C) Frequency of TRP-1 T cells in the peripheral blood was assessed relative to endogenous levels of VB14+ TCR over indicated time post adoptive transfer. n=5mice/group. Mean and standard deviation shown. Statistical Tests: C) Mann Whitney U test. *p<0.05, **p<0.01.


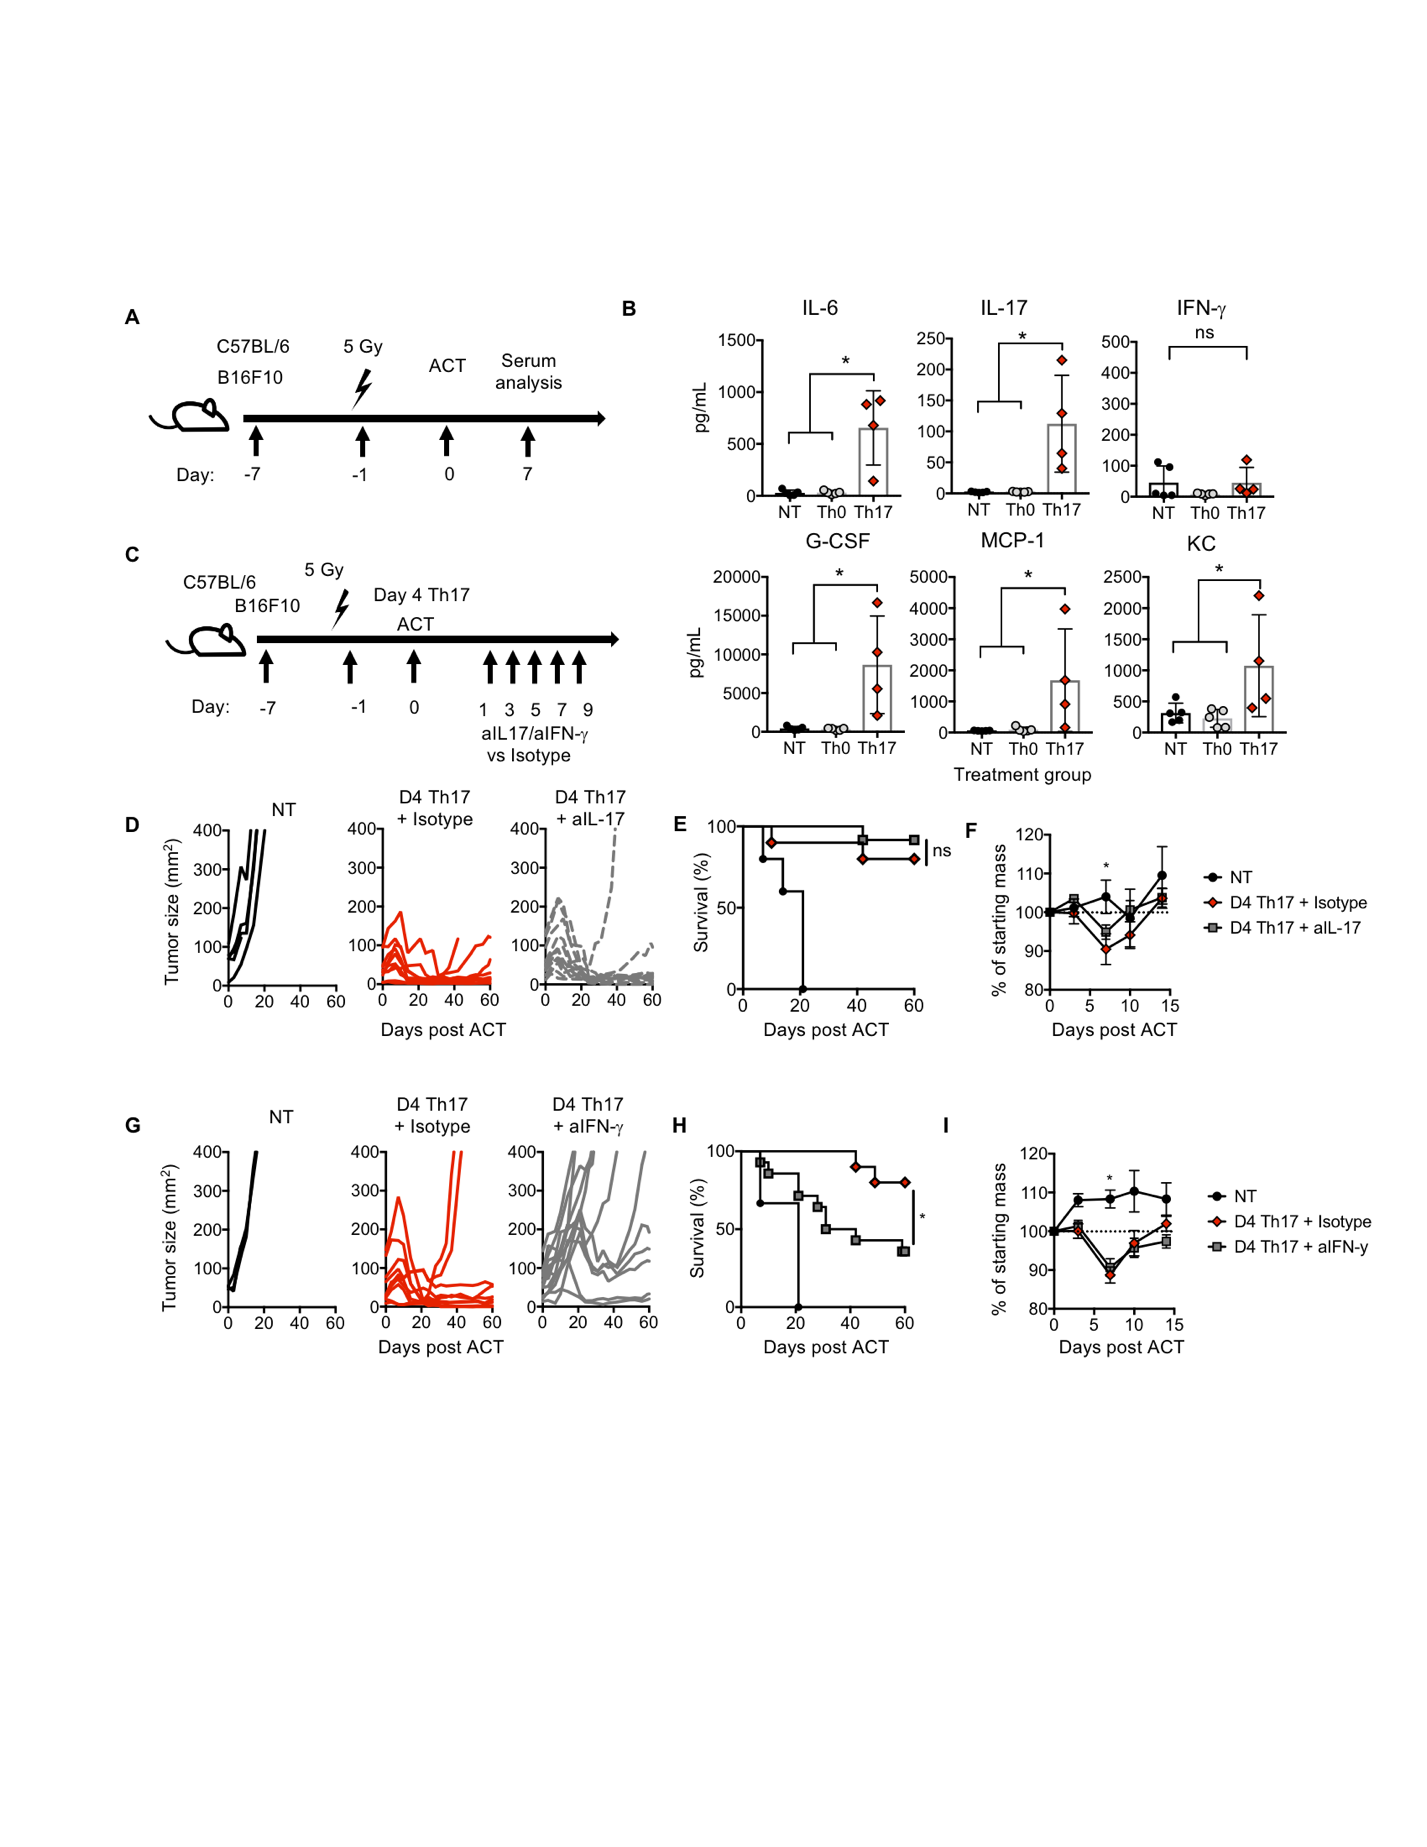


**Figure S2. Th17 polarization is important for cytokine induction in the host.** A) Schematic of ACT sequence. 0.4x106 CD4+ Th0 (unpolarized) or CD4+Th17 TRP-1 T cells were expanded four days and infused into mice with B16F10 melanoma after 5 Gy TBI. B) Concentration of serum cytokines one week post ACT. n=4-5mice/group. C) 0.4x106 Day 4 Th17 cells were infused into B16F10 bearing animals one day post 5 Gy TBI. Either IL-17 (D-F) or IFN-g (G-I) were neutralized with 100mg antibodies administered intraperitoneally every other day for 5 cycles. D) Tumor curves, E) survival, and F) weight change in animals treated with Day 4 Th17 cells and IL-17 neutralization. G) Tumor curves, H) survival, and I) weight change in animals treated with Day 4 Th17 cells and IFN-g neutralization. Results representative of two independent experiments with similar results. Statistical tests: B, F, I) Mann Whitney U Test, E), H) Log-rank test. ns, not significant, *p<0.05. NT, no treatment. Mean and standard deviation shown.


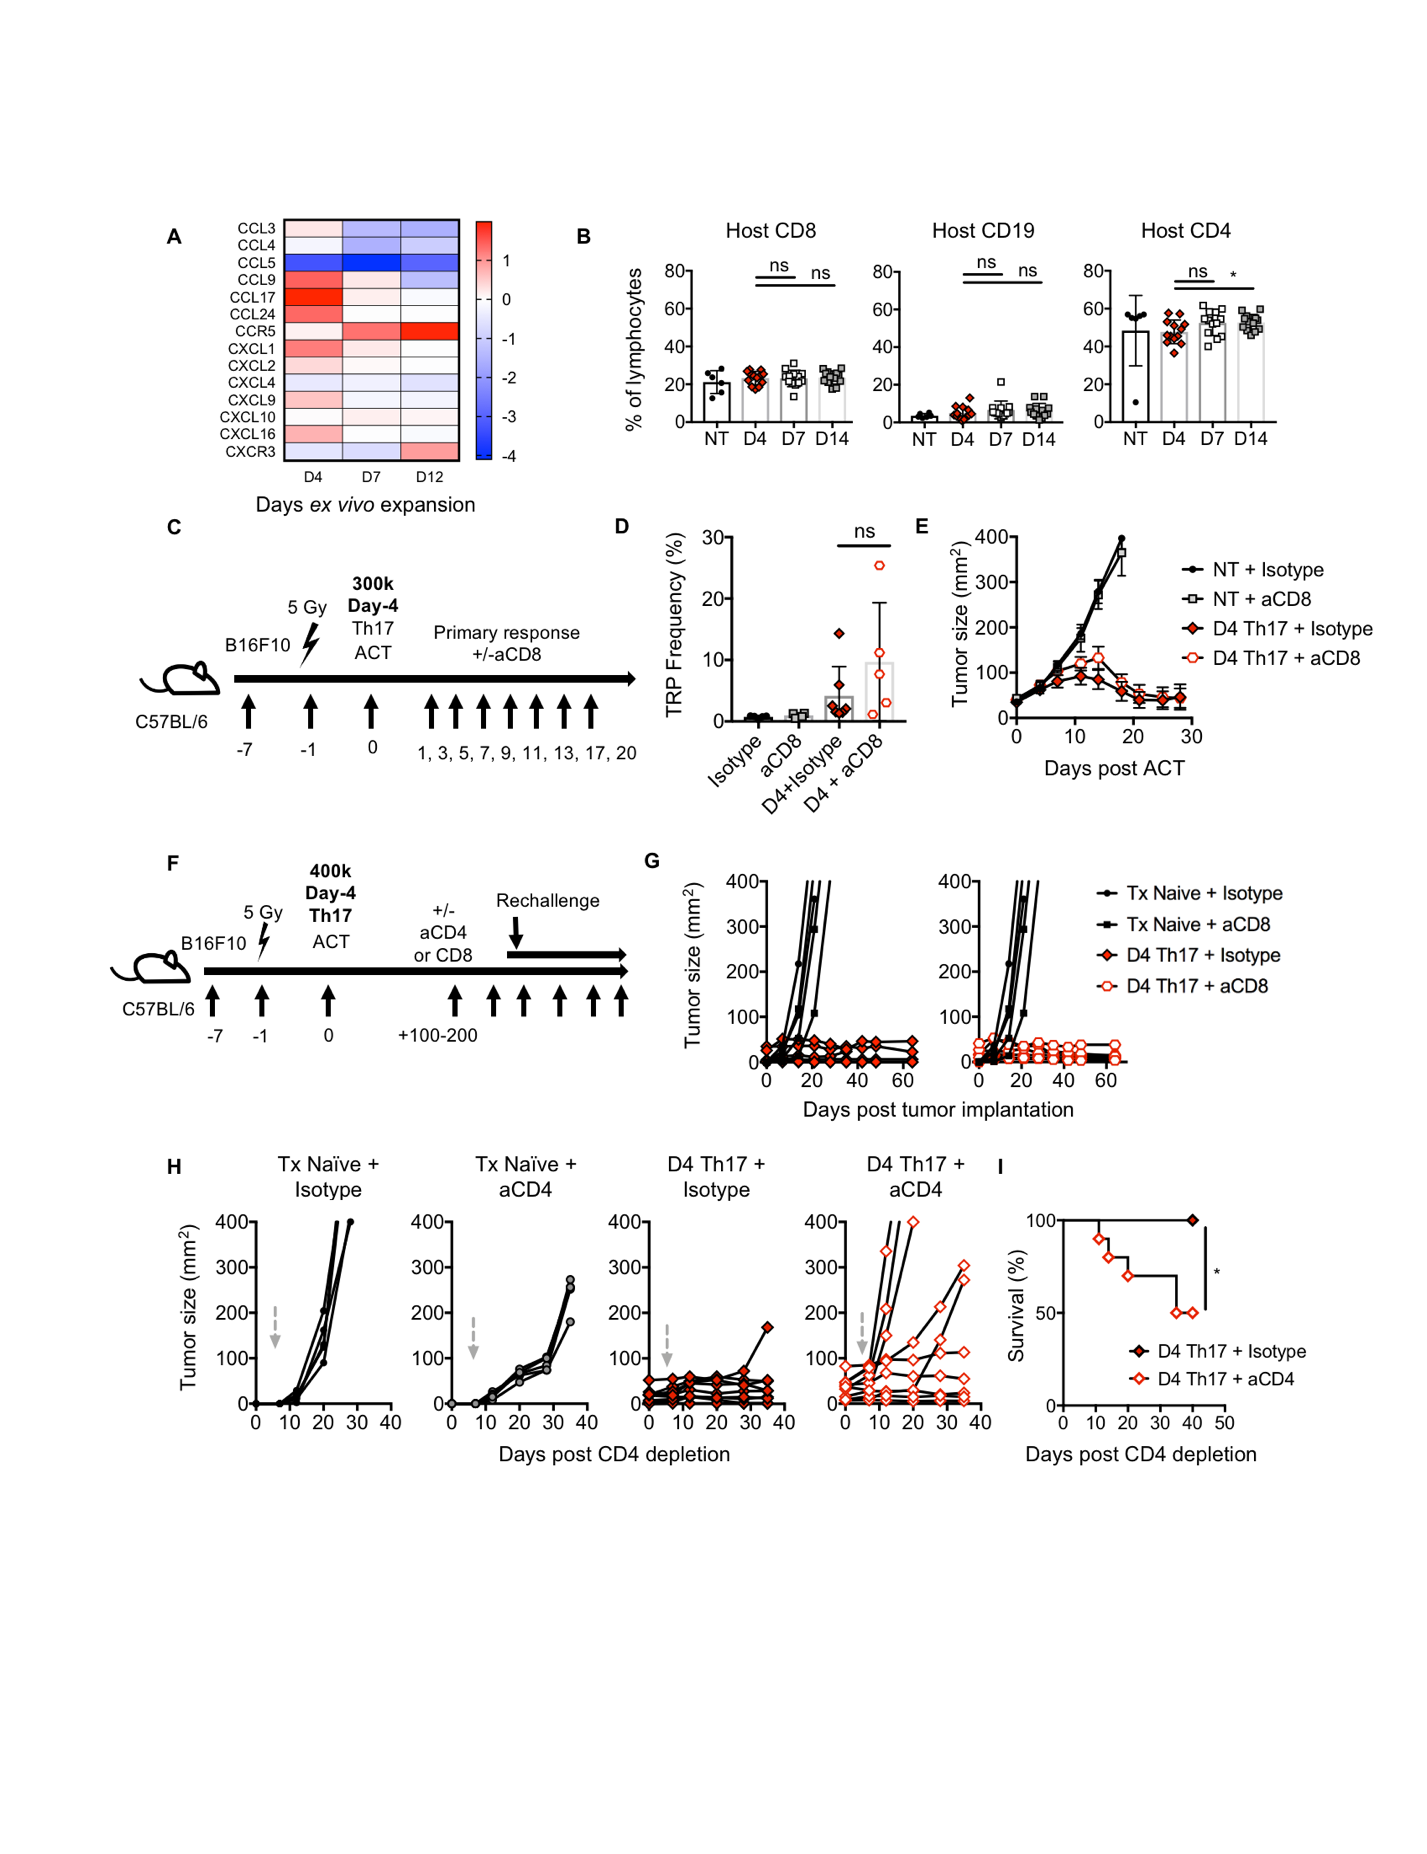


**Figure S3. Expanded Th17 cells do not require host CD8+ T cells to regress tumors.** A)Heat maps display (+/-) log2 fold change in gene expression of chemokine receptors and chemokines from expanded TRP-1 Th17 cells over time relative to naïve, unpolarized TRP-1 CD4+ T cells. Gene array conducted on spleens compiled from 6 TRP-1 animals. B) Frequency of host lymphocytes infiltrating tumors one-week post ACT of 0.4x106 Day 4, 7, or 14 Th17 cells. n=6 NT, n=13 treatment groups. C) B16F10 tumor-bearing animals were treated with 0.3x106 Day 4 Th17 cells one day post TBI. CD8+ T cells were depleted with antibodies on the days indicated post ACT. D) Engraftment of donor T cells and E) tumor curves of animals treated as in C). NT + Isotype, n=5; NT + aCD8, n=4; D4 Th17 + Isotype n=7; D4 Th17 + aCD8, n=5. F) Mice with B16F10 tumors were treated with 0.4x106 Day 4 Th17 cells, which cleared tumors. Over 100 days post ACT, CD8+ or CD4+ T cells were depleted with antibodies. Animals were then rechallenged with 0.5x106 B16F10 tumor cells subcutaneously. G) Tumor curves from CD8+ depletion in F). Treatment-naïve animals, n=5; D4 Th17 + Isotype, n=6; D4 Th17 + aCD8, n=7, combined from two independent experiments. H) Tumor curves and I) survival of CD4+ depletion in F). Gray arrow indicates tumor rechallenge. Treatment naïve animals, n=5; D4 Th17 + Isotype, n=9; D4 Th17 + aCD4, n=10, combined from two independent experiments. Statistical tests: B, D) Mann Whitney U test, I) Log-rank test. ns, not significant; *p<0.05.


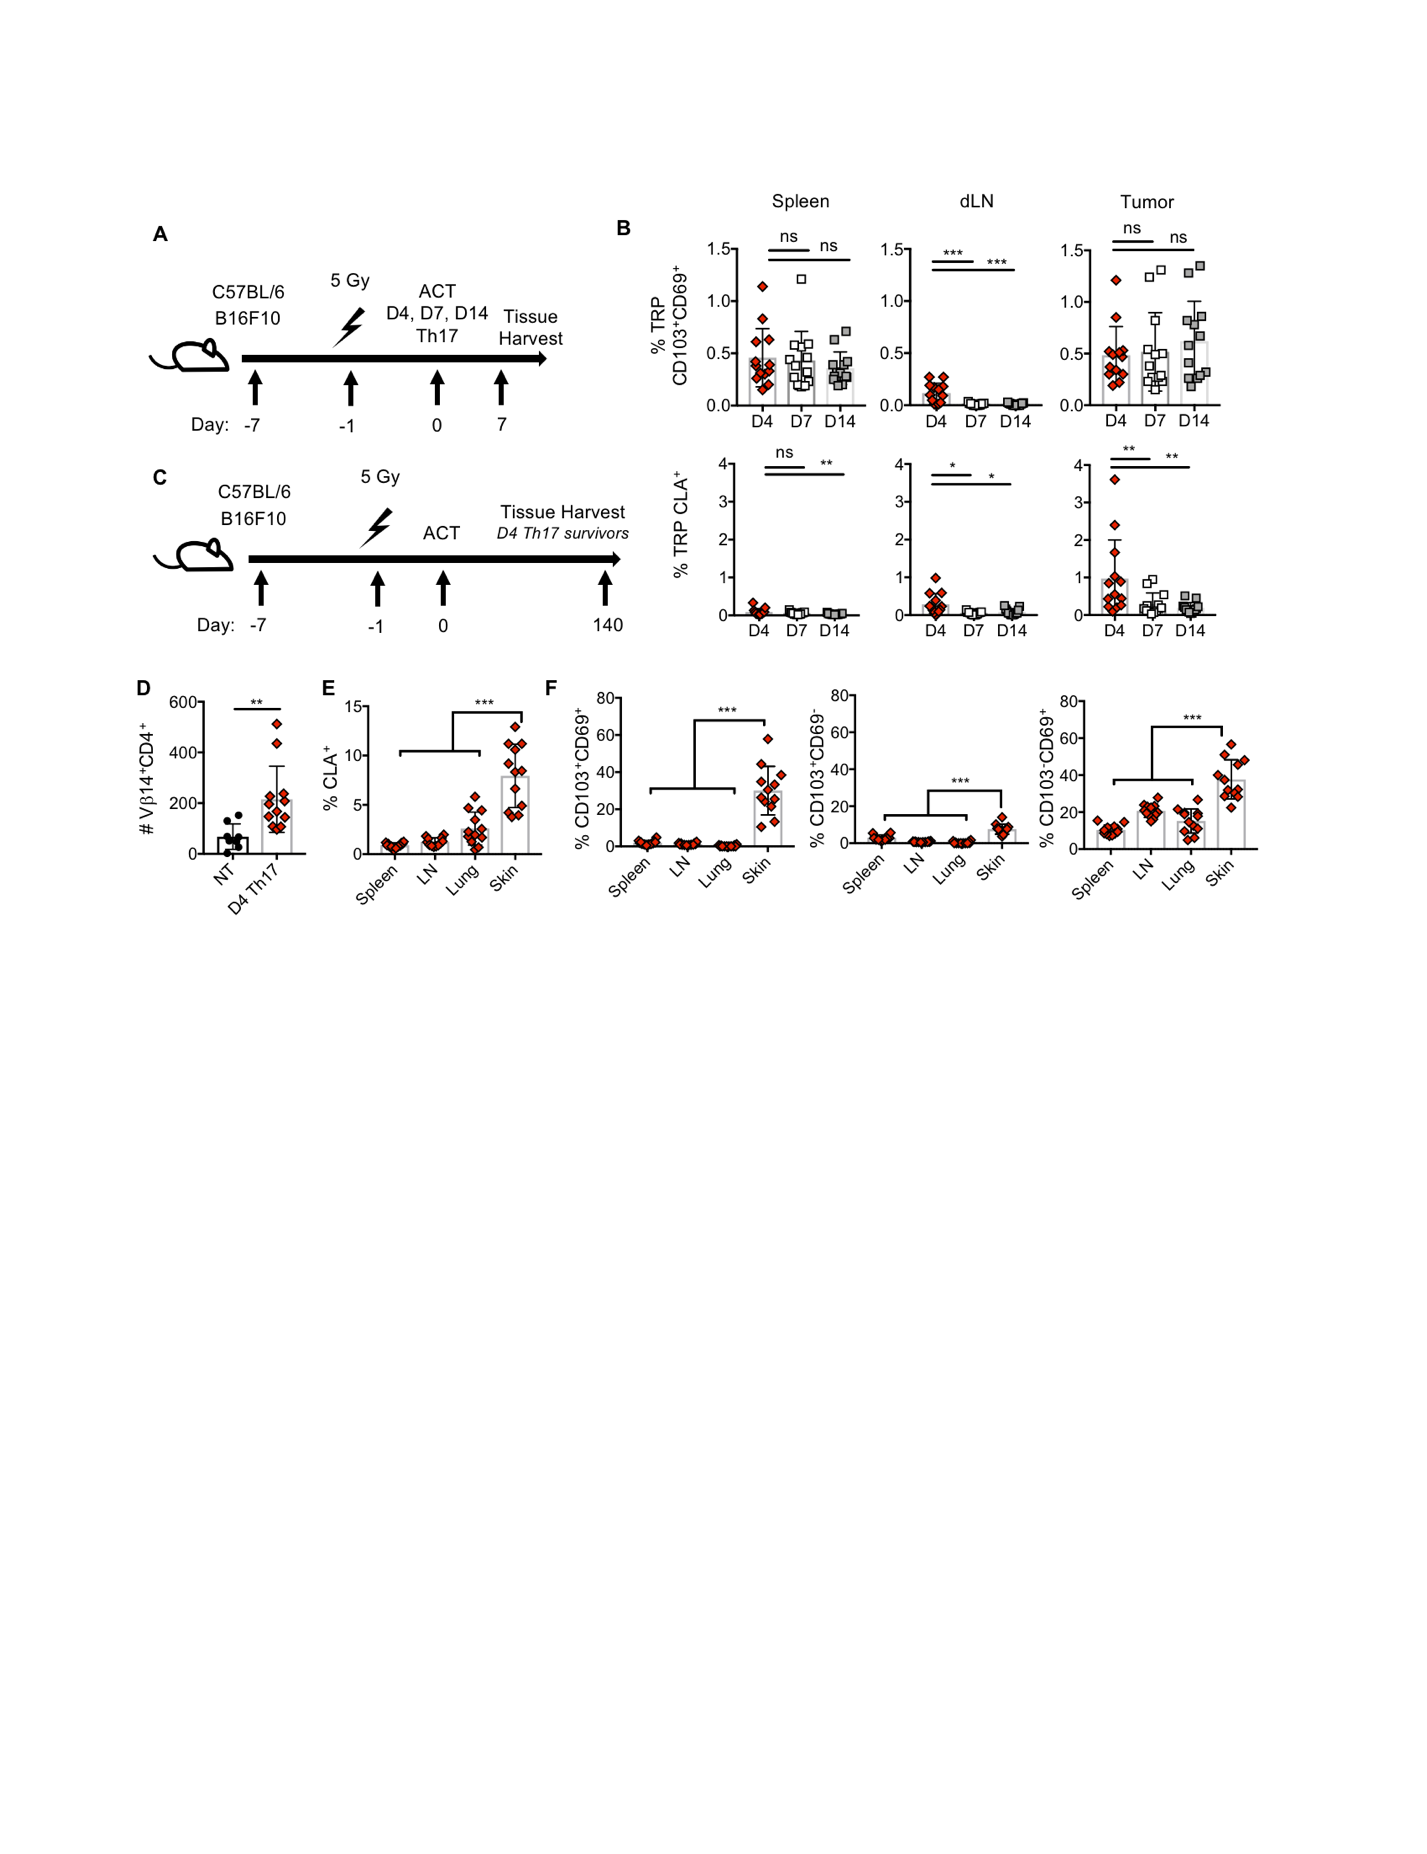


**Figure S4. Day 4 Th17 cells persist in the skin after tumor clearance.** A) 0.4x106 Day 4, 7, or 14 Th17 cells were transferred into mice with B16F10 tumors one day after 5Gy TBI. B) Expression of surface markers on donor T cells infiltrating tumors one-week post ACT. C) Surviving animals treated with Day 4 Th17 cells were euthanized 100 days post ACT and assessed for distribution of persisting donor T cells. D) Number of donor cells persisting in skin. Treatment-naïve, n=6; Day 4 Th17 survivors, n=12. E-F) Frequency of donor VB14+ CD4+ T cells expressing surface markers categorized by organ, representative of two independent experiments. n=12 animals. Statistical tests: B, D, E, F) Mann Whitney U Test. ns, not significant, *p<0.05, **p<0.01, ***p<0.001.


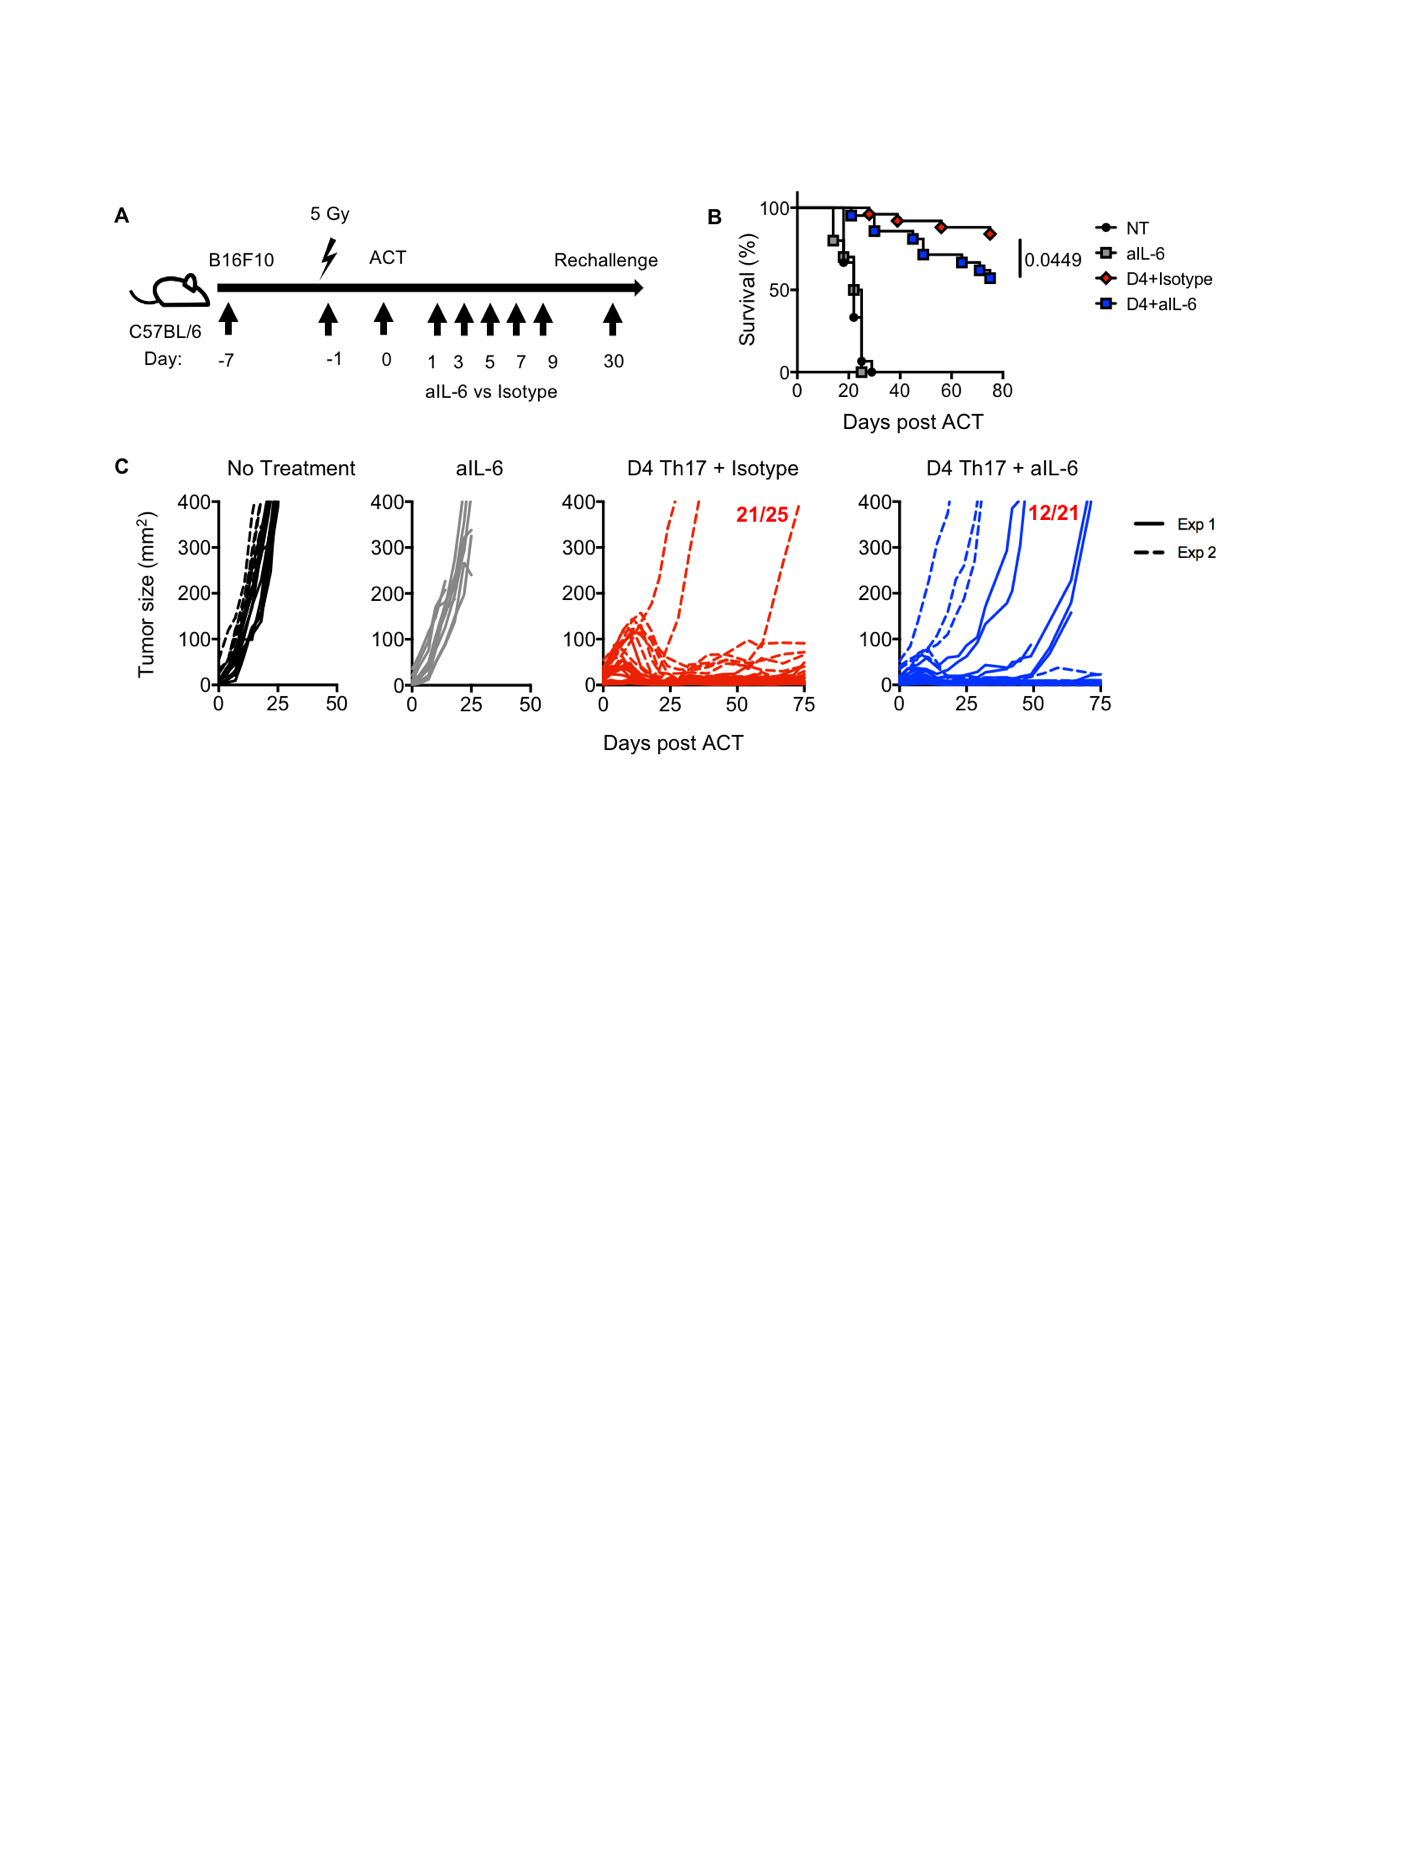


**Figure S5. IL-6 neutralization impairs durable immunity for Day 4 Th17 cell therapy.** A) Schematic of ACT sequence. 0.4x106 Day 4 TRP-1 Th17 cells were transferred one day post 5Gy TBI into animals bearing one-week established B16F10 tumors. Anti-IL-6 or isotype control were administered intraperitoneally in doses of 100mg/mouse every other day for 5 cycles. Animals were rechallenged with subcutaneous B16F10 tumor. B) Survival and C) Tumor response post ACT. No treatment, *n*=15; aIL-6R, *n*=10; D4 Th17 + Isotype, *n*=25; D4 Th17 + aIL-6, n=21. Results from two independent experiments combined and displayed. Statistical tests: B) Log-rank test.


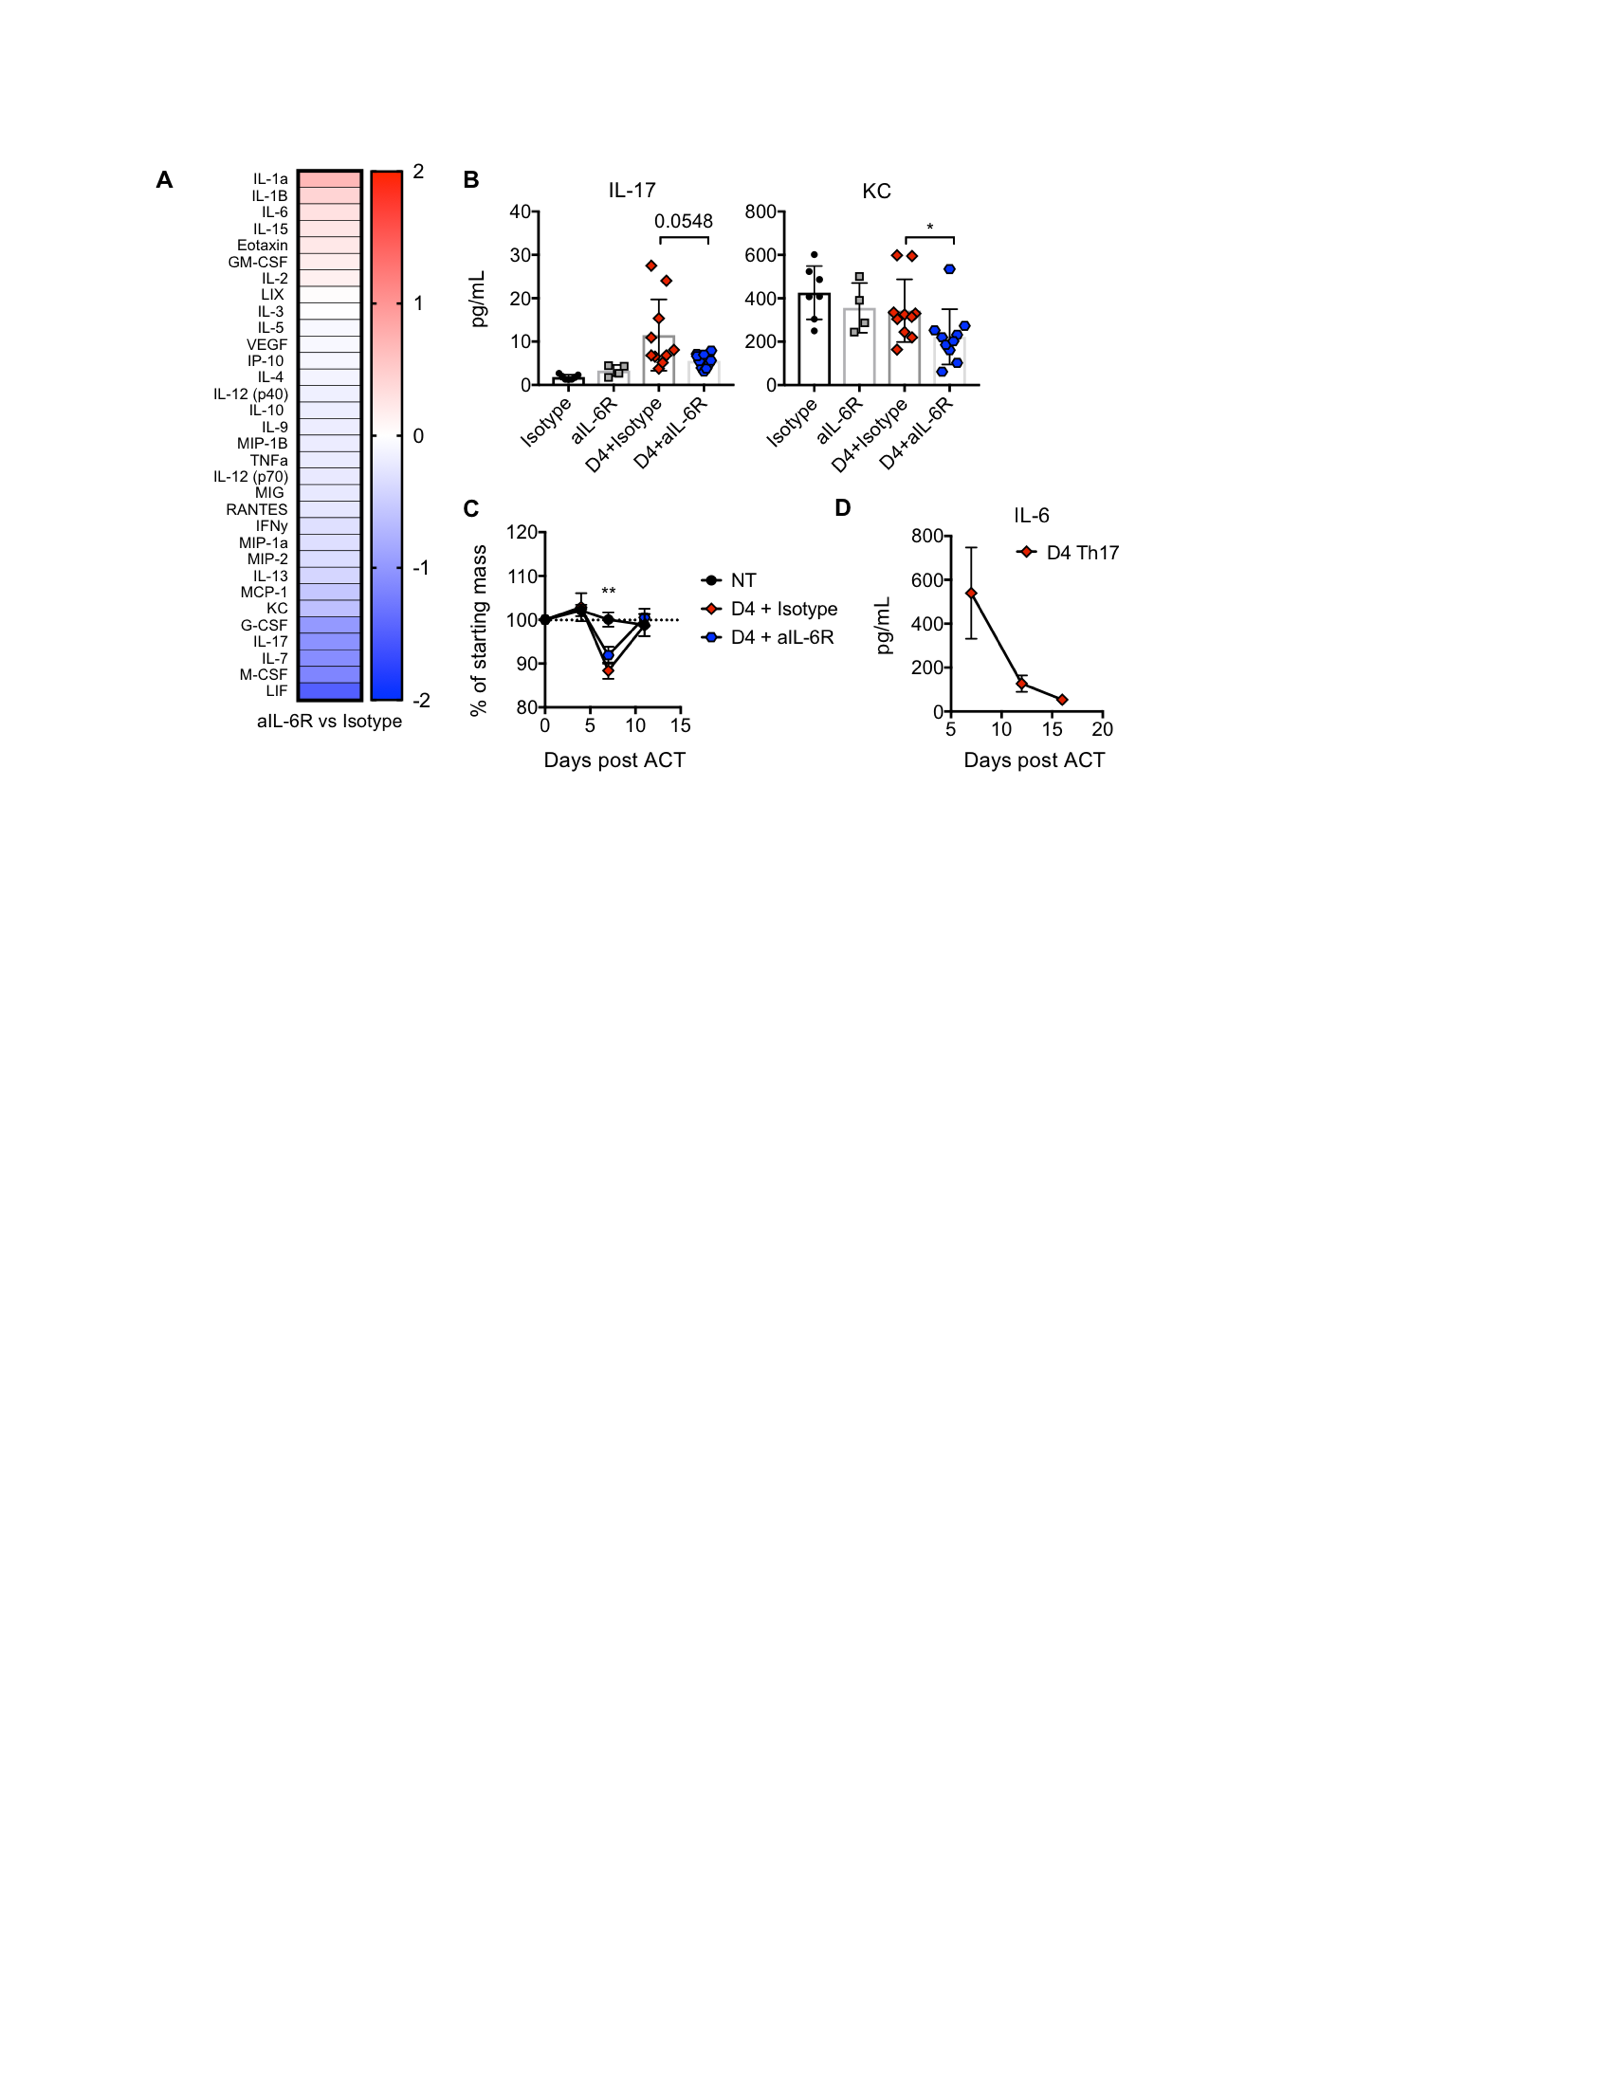


**Figure S6. IL-6 blockade does not significantly alter other systemic cytokines.** A) 0.4x106 Day 4 Th17 cells were transferred into animals bearing B16F10 tumors after 5Gy TBI. IL-6R blockade or isotype (100mg/injection) were administered every other day after ACT for 5 cycles. Serum cytokines were analyzed 11 days post ACT. Heat map displays (+/-) log2 fold change of average serum cytokine concentration in animals treated with aIL-6R relative to isotype. B) Serum cytokine concentrations for IL-17 and KC upon IL-6R blockade. NT + Isotype n=7, NT + aIL-6R n=4, D4 Th17 + Isotype/aIL-6R n=10. C) Weight change in the first 12 days post ACT. NT n=10, D4 Th17 + Isotype n=9, D4 Th17 + aIL-6R n=11. D) Serum IL-6 in animals treated with 0.4x106 Day 4 Th17 cells over time. n=5 per time point. All experiments are representative of at least two independent experiments with similar results.
